# Supplementary material for: Surface modified PMMA nanoparticles with tunable drug release and cellular uptake
Source: Royal Society of Chemistry journal article supplement (doi:10.1039/c4ra07939f), 2014-01-01
Supplement: c4ra07939f1.pdf [file c4ra07939f1.pdf]

## Surface modified PMMA nanoparticles with tunable drug release and cellular uptake

Ridhima Juneja and Indrajit Roy

Department of Chemistry, University of Delhi, Delhi-110007, India.

Phone: +91-9560721851

E-mail: indrajitroy11@gmail.com

Enclosure: Two figures

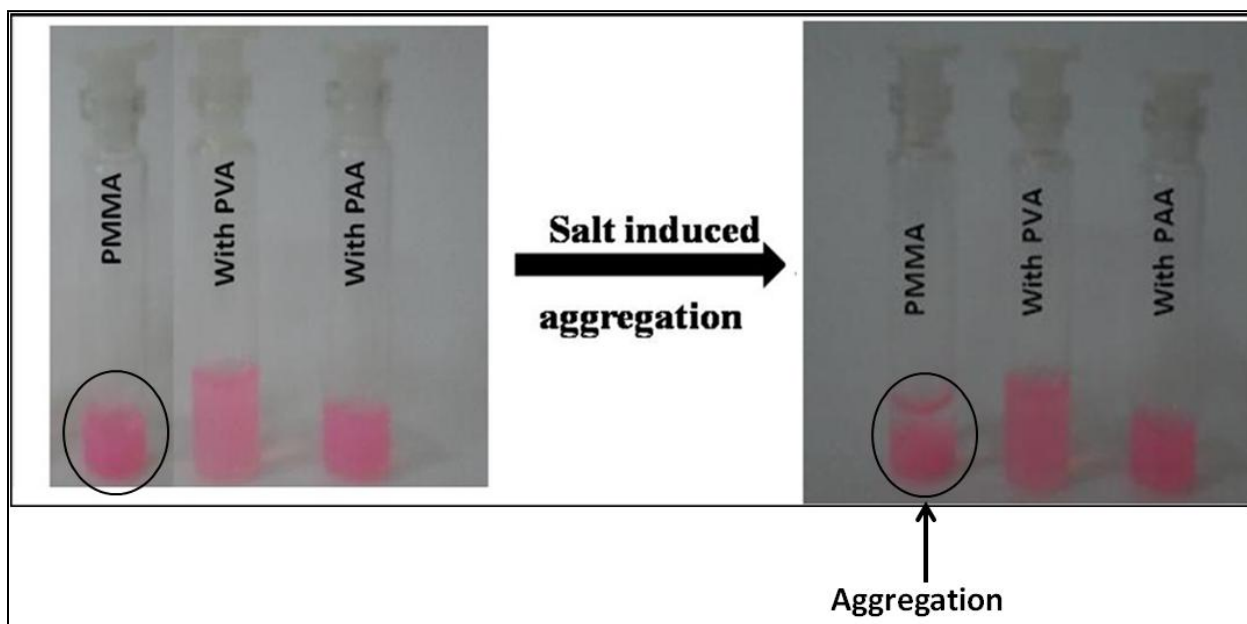

**Fig. S1:** Photographs showing the effect of salt containing medium (saline) on the colloidal stability of fluorophore-doped PMMA nanoparticles, uncoated (left), and coated with PVA (middle) and PAA (right). The uncoated nanoparticles aggregated in the saline medium, whereas both the PVA and PAA coated nanoparticles remained colloidal stable under the same conditions. The arrowhead shows the nanoparticle aggregation.

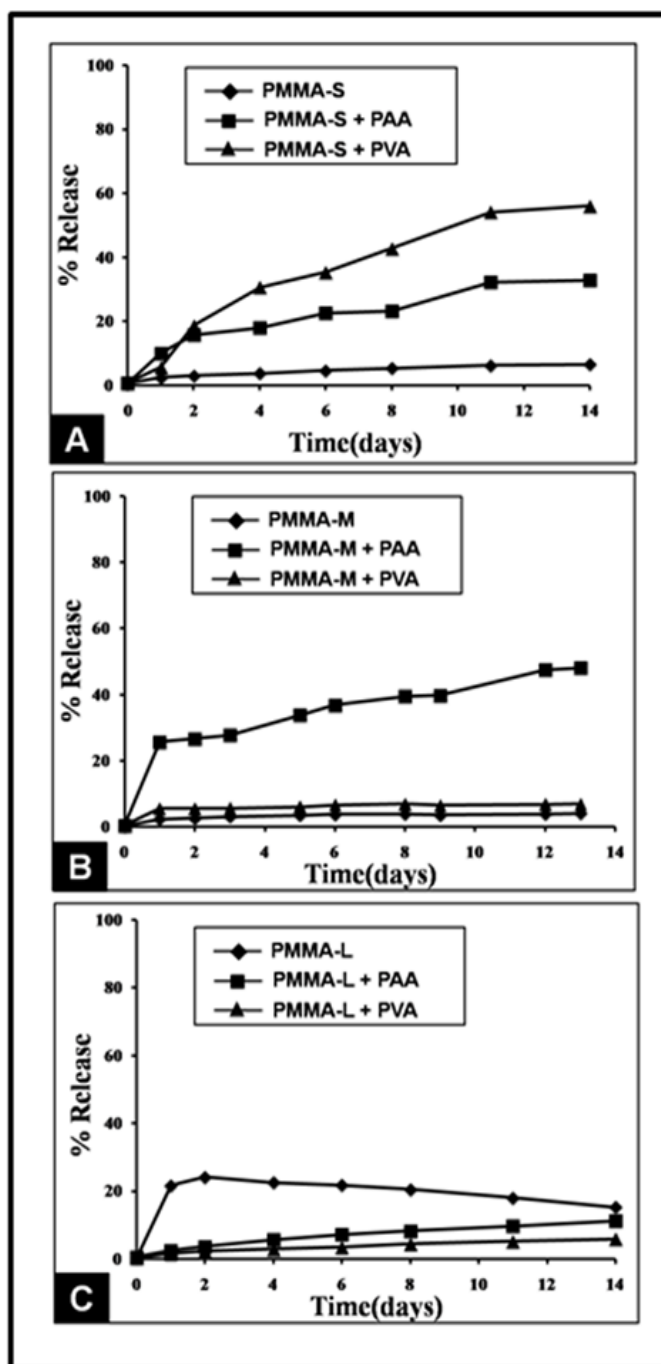

**Fig. S2:** Time dependent release profiles of the fluorophore Nile red from (A) small, (B) medium, and (C) large PMMA nanoparticles, designated by PMMA-S, PMMA-M and PMMA-L, respectively. The effects of surface modification of the PMMA surface with the polymers PVA and PAA on the release profile of the fluorophore are shown for nanoparticles of all the three nanoparticle batches.
